# Supplementary material for: KIF11 Serves as an Independent Prognostic Factor and Therapeutic Target for Patients With Lung Adenocarcinoma
Source: Front Oncol. 2021 Apr 23;11:670218. doi: 10.3389/fonc.2021.670218 (PMC8103954; doi:10.3389/fonc.2021.670218)
Supplement: Supplementary file 5 [file Table_5.xlsx]

## Sheet: Sheet1
Table S4. KEGG enrichment analysis of DEGs between low and high KIF11 expression subgroups.
ID	Description	GeneRatio	BgRatio	pvalue	p.adjust	qvalue	geneID	Count
hsa04110	Cell cycle	63/1536	124/8076	1.02598e-15	3.33442e-13	2.55954e-13	CDK2/MCM3/YWHAG/BUB1B/STAG2/RBL2/CHEK2/MAD2L2/CHEK1/TFDP1/CCND3/CDK4/CDC20/GSK3B/YWHAH/E2F3/SMC3/CDC45/GADD45G/SMC1A/YWHAB/PTTG1/ORC1/DBF4/PKMYT1/CCNB1/MYC/PLK1/ANAPC7/BUB3/CDK6/GADD45B/TTK/SKP1/MCM4/MCM2/BUB1/CDC6/CCNE1/HDAC1/E2F1/TGFB1/YWHAZ/PRKDC/CDKN2A/YWHAQ/ESPL1/CDC27/MCM5/CDC7/MCM7/CCNA2/SKP2/PCNA/RAD21/CDKN2C/CUL1/MAD2L1/CCNB2/CDC25B/MCM6/CDK1/HDAC2	63
hsa03050	Proteasome	33/1536	46/8076	9.32893e-15	1.21262e-12	9.3082e-13	PSMC5/PSMA5/PSMD11/PSMA7/PSMD12/PSMB5/PSMB3/PSMC4/PSMB1/PSMC2/PSMB6/PSMB4/PSMA1/PSMB2/PSMB9/PSMD8/PSMD1/ADRM1/PSMA6/PSMD14/PSMA3/PSME3/PSMD7/PSMD2/PSMC6/PSMB7/PSMD3/PSME4/PSMC3/POMP/PSMA4/PSME2/PSMD4	33
hsa03040	Spliceosome	70/1536	151/8076	1.11934e-14	1.21262e-12	9.3082e-13	SRSF2/LSM5/RBM8A/HSPA1B/SNRPC/PHF5A/HNRNPU/PLRG1/WBP11/SF3A2/CDC5L/EIF4A3/TRA2B/SF3B2/EFTUD2/USP39/SNW1/DHX15/SNRPD1/SF3B6/SNRNP200/SNRPG/PCBP1/SRSF3/PPIL1/PRPF19/HNRNPM/MAGOH/SNRPD2/SRSF5/SRSF8/SNRPF/HSPA8/PRPF40A/HNRNPA1/SF3B4/SNRPB2/RBMX/SNRPD3/BCAS2/SRSF9/U2AF2/LSM2/BUD31/NCBP1/SF3A3/SNRPA1/LSM4/SNRPE/HNRNPC/SNRPA/CTNNBL1/SRSF1/U2SURP/PUF60/SNRPB/ALYREF/PRPF4/SNRNP40/HSPA1A/NCBP2/DDX23/RBM17/…	70
hsa03030	DNA replication	25/1536	36/8076	5.49446e-11	4.46425e-09	3.42681e-09	SSBP1/POLA2/RFC5/MCM3/POLD1/FEN1/LIG1/RFC3/POLE2/RFC4/POLD2/MCM4/MCM2/RPA3/RFC1/RNASEH2A/RPA1/MCM5/MCM7/PCNA/RNASEH1/POLE3/PRIM1/MCM6/RFC2	25
hsa04141	Protein processing in endoplasmic reticulum	64/1536	171/8076	9.97682e-09	6.48493e-07	4.97791e-07	DNAJB2/UBE2G1/HSPBP1/STUB1/HSPA1B/SSR1/SEC61A1/LMAN1/DAD1/ERO1A/DERL1/SEL1L/RAD23A/RNF5/SEC61G/VCP/PLAA/SSR3/DNAJA1/FBXO2/LMAN2/HSP90AB1/RPN1/UBQLN4/HSPA8/TUSC3/OS9/SSR4/CKAP4/WFS1/UBXN6/PREB/EIF2AK1/HSP90B1/SKP1/EDEM2/NPLOC4/STT3A/HERPUD1/GANAB/RRBP1/HSPH1/RPN2/UBQLN1/UBE2D1/UBXN4/EIF2AK2/HSPA1A/SIL1/UBE2J1/SEC23A/HSP90AA1/DNAJC10/EIF2S1/DNAJB11/BAG1/PDIA4/CUL1/DDIT3/HYOU1/CAPN2/PDIA6/RAD23B/UGG…	64
hsa05014	Amyotrophic lateral sclerosis	110/1536	364/8076	9.5148e-08	5.15385e-06	3.95616e-06	NUP205/CAT/ACTR1B/UQCR11/DNALI1/PSMC5/NUP210/NUP62/NDUFB10/PSMA5/DERL1/PSMD11/RB1CC1/TUBB/NEFH/PSMA7/VCP/PSMD12/ATXN2L/KIF5B/ANG/TPR/SIGMAR1/PSMB5/UQCRFS1/PSMB3/TUBA4A/COX4I2/PSMC4/TUBB6/PSMB1/PSMC2/PSMB6/PSMB4/SRSF3/ANXA11/PSMA1/PFN2/NUP188/PSMB2/NDUFA2/ATP5F1C/HNRNPA2B1/PSMD8/UBQLN4/HNRNPA1/GABARAPL2/ATP5F1B/NUP54/NUP37/TUBB4B/SQSTM1/ATP5MC3/TUBA1C/ACTG1/CYCS/GPX1/NUP50/NCBP1/PPP3R1/RAC1/PSMD1/…	110
hsa05012	Parkinson disease	79/1536	249/8076	7.79464e-07	3.61894e-05	2.77794e-05	MAOA/UBE2G1/UQCR11/PSMC5/NDUFB10/PSMA5/PSMD11/TUBB/PSMA7/UBE2L3/PSMD12/KIF5B/PSMB5/UQCRFS1/PSMB3/TUBA4A/COX4I2/PSMC4/TUBB6/PSMB1/PSMC2/PSMB6/PSMB4/PSMA1/PSMB2/NDUFA2/TXN/ATP5F1C/UBA1/CALML3/PSMD8/UBA7/MFN1/ATP5F1B/TUBB4B/ATP5MC3/TUBA1C/CYCS/PSMD1/VDAC1/NDUFS6/CYC1/MAOB/UQCRH/ADRM1/PSMA6/PSMD14/PSMA3/LRRK2/TUBB2B/VDAC2/DUSP1/COX7A1/NDUFB4/SLC25A6/CASP3/PSMD7/PSMD2/PSMC6/UBE2L6/TXN2/VDAC3/PSMB7/CAL…	79
hsa04145	Phagosome	54/1536	152/8076	9.90605e-07	4.02433e-05	3.08912e-05	HLA-DQA1/COMP/ATP6V0D1/SEC61A1/CYBA/RILP/TFRC/SFTPA1/TUBB/SCARB1/SEC61G/TUBA4A/NCF4/TUBB6/M6PR/THBS2/TAP2/HLA-E/HLA-DRA/ITGAV/CTSL/RAB7A/HLA-DMA/HLA-DRB5/ATP6V1C1/ATP6V1A/FCGR3A/HLA-DPA1/TUBB4B/HLA-DMB/ITGA5/TUBA1C/ACTG1/HLA-DPB1/RAC1/HLA-DOA/TUBB2B/ATP6V0E1/ACTB/DYNC1H1/HLA-DQB1/RAB7B/MARCO/HLA-DRB1/ITGB1/COLEC12/TAP1/TUBA1B/HLA-DOB/SFTPD/TLR2/SFTPA2/DYNC1I2/C3	54
hsa03430	Mismatch repair	15/1536	23/8076	1.51328e-06	5.46462e-05	4.1947e-05	SSBP1/RFC5/MSH2/MSH6/POLD1/EXO1/LIG1/RFC3/RFC4/POLD2/RPA3/RFC1/RPA1/PCNA/RFC2	15
hsa04216	Ferroptosis	21/1536	41/8076	3.41167e-06	0.000110879	8.51121e-05	ACSL5/TFRC/PCBP2/SAT2/STEAP3/GPX4/PCBP1/ACSL3/SLC39A14/SLC39A8/GCLC/SLC40A1/MAP1LC3A/MAP1LC3B/GSS/VDAC2/ACSL4/VDAC3/SLC7A11/SLC3A2/GCLM	21
hsa00010	Glycolysis / Gluconeogenesis	29/1536	67/8076	4.12928e-06	0.000117215	8.99757e-05	PGK1/ALDOA/ALDH3B1/DLD/HK2/ALDH2/TPI1/ALDH1B1/PGM2/MINPP1/GAPDH/HK1/FBP1/ALDH3B2/DLAT/ENO1/LDHB/ADH1B/LDHA/PKM/ENO2/ACSS1/ALDH3A2/ACSS2/PGAM1/GPI/ALDH3A1/ALDH9A1/PFKP	29
hsa03013	RNA transport	61/1536	186/8076	4.32795e-06	0.000117215	8.99757e-05	NUP205/RBM8A/TGS1/NUP210/NUP62/RPP25/FXR1/XPO1/RANGAP1/EIF4A3/PNN/TPR/EIF2S2/EIF4G1/SUMO1/CASC3/EEF1A1/MAGOH/NUP188/EIF4EBP1/PABPC1/EIF4G3/EIF3I/RAN/XPO5/EIF5B/EIF5/NUP54/XPOT/NUP37/PAIP1/POP7/NUP50/NCBP1/TARDBP/EIF3B/CLNS1A/NUP153/NMD3/NUP98/NUP155/EIF2S3/NUP85/NUP107/EIF2B1/ALYREF/EIF4G2/NCBP2/PRMT5/EIF3A/SENP2/EIF2S1/CYFIP2/RANBP2/SUMO2/TACC3/EIF3J/EIF4EBP3/KPNB1/NDC1/STRAP	61
hsa03410	Base excision repair	18/1536	33/8076	5.38147e-06	0.000134537	0.000103272	POLD1/FEN1/PARP3/NTHL1/LIG1/UNG/POLE2/PARP1/HMGB1/NEIL3/MPG/POLD2/APEX1/TDG/MBD4/PCNA/POLE3/PARP2	18
hsa01200	Carbon metabolism	43/1536	118/8076	5.89511e-06	0.000136851	0.000105048	PGK1/CAT/ALDOA/DLD/ACAT2/RPE/HK2/TPI1/GLUD1/PRPS2/GAPDH/IDH2/PRPS1/PHGDH/HK1/G6PD/FBP1/SHMT2/DLAT/ENO1/MDH1/ACADS/RPIA/HADHA/PSPH/GOT1/PKM/CS/ENO2/ACSS1/CPS1/ACSS2/GOT2/PGD/PGAM1/GPI/SDHA/PFKP/FH/MDH2/PSAT1/ME1/SDS	43
hsa05169	Epstein-Barr virus infection	63/1536	202/8076	1.86607e-05	0.000396795	0.000304585	HLA-DQA1/TRADD/PSMC5/DDX58/CDK2/PSMD11/ISG15/PSMD12/TAB2/SNW1/CCND3/CDK4/PSMC4/PSMC2/TAP2/HLA-E/E2F3/OAS2/HLA-DRA/GADD45G/PSMD8/HLA-DMA/HLA-DRB5/MYC/HLA-DPA1/HLA-DMB/JUN/IRAK1/CYCS/CDK6/GADD45B/HLA-DPB1/RAC1/PSMD1/CCNE1/ADRM1/PSMD14/HLA-DOA/STAT1/HDAC1/E2F1/CASP3/PSMD7/TNFAIP3/PSMD2/PSMC6/HLA-DQB1/EIF2AK2/CCNA2/PSMD3/SKP2/PSMC3/HLA-DRB1/OAS3/ENTPD3/TAP1/STAT2/OAS1/CXCL10/HLA-DOB/TLR2/PSMD4/HDAC2	63
hsa05020	Prion disease	80/1536	273/8076	1.95345e-05	0.000396795	0.000304585	UQCR11/HSPA1B/PSMC5/CYBA/NDUFB10/PSMA5/PSMD11/TUBB/PSMA7/PSMD12/KIF5B/PSMB5/UQCRFS1/PSMB3/TUBA4A/COX4I2/NCF4/PSMC4/CSNK2A1/TUBB6/PSMB1/PSMC2/GSK3B/PSMB6/PSMB4/PSMA1/PSMB2/NDUFA2/ATP5F1C/C7/PSMD8/HSPA8/CREB3L1/ATP5F1B/TUBB4B/ATP5MC3/TUBA1C/CYCS/LAMC1/PPP3R1/RAC1/PSMD1/VDAC1/NDUFS6/CYC1/UQCRH/ADRM1/PSMA6/PSMD14/MAPK1/PSMA3/TUBB2B/VDAC2/COX7A1/NDUFB4/STIP1/SLC25A6/CASP3/PSMD7/PSMD2/PSMC6/PRKCD/HSPA1…	80
hsa04120	Ubiquitin mediated proteolysis	47/1536	140/8076	2.73184e-05	0.000522263	0.000400895	UBE2G1/CUL4B/STUB1/RNF7/UBR5/RHOBTB2/UBE2L3/DDB1/FBXO2/HUWE1/MGRN1/CDC20/UBA2/PRPF19/NEDD4L/UBE2R2/UBE2E3/UBE2S/UBA1/ITCH/UBA6/UBE2H/UBE2C/UBA7/UBE2Z/UBE2N/UBE2K/ANAPC7/ELOC/ELOB/UBE3C/SKP1/BIRC6/WWP2/SAE1/CDC34/UBE2D1/UBE2L6/CDC27/UBE2J1/SKP2/TRIP12/BIRC2/CUL2/CUL1/UBE2M/CBLC	47
hsa00270	Cysteine and methionine metabolism	22/1536	50/8076	4.36714e-05	0.000788511	0.00060527	MAT2B/SMS/AHCYL2/PHGDH/DNMT1/IL4I1/ENOPH1/SRM/TST/AHCY/LDHB/MDH1/GCLC/LDHA/GOT1/GSS/GOT2/ADI1/GCLM/MDH2/PSAT1/SDS	22
hsa01230	Biosynthesis of amino acids	29/1536	75/8076	5.48999e-05	0.000939077	0.000720846	PGK1/ALDOA/PYCR1/PYCR2/RPE/MAT2B/TPI1/ASS1/PRPS2/GAPDH/IDH2/PRPS1/PHGDH/ALDH18A1/SHMT2/ENO1/RPIA/PSPH/GOT1/PKM/CS/ENO2/CPS1/GOT2/ASNS/PGAM1/PFKP/PSAT1/SDS	29
hsa05016	Huntington disease	85/1536	306/8076	9.21054e-05	0.00149671	0.00114889	POLR2C/ACTR1B/UQCR11/DNALI1/PSMC5/NDUFB10/PSMA5/PSMD11/RB1CC1/TUBB/PSMA7/PSMD12/KIF5B/PSMB5/UQCRFS1/PSMB3/TUBA4A/COX4I2/PSMC4/TUBB6/PSMB1/PSMC2/POLR2L/PSMB6/PSMB4/POLR2B/SOD2/PSMA1/PSMB2/NDUFA2/ATP5F1C/SP1/PSMD8/CREB3L1/AP2M1/AP2S1/POLR2D/ATP5F1B/TUBB4B/ATP5MC3/TUBA1C/CLTC/CYCS/GPX1/PSMD1/VDAC1/NDUFS6/CYC1/UQCRH/ADRM1/PSMA6/PSMD14/IFT57/PSMA3/POLR2K/HDAC1/TUBB2B/AP2B1/VDAC2/GPX3/COX7A1/NDUFB4/SLC…	85
hsa00620	Pyruvate metabolism	18/1536	39/8076	0.000100847	0.00156073	0.00119804	HAGH/DLD/ACAT2/ALDH2/ALDH1B1/DLAT/LDHD/LDHB/MDH1/LDHA/PKM/ACSS1/ALDH3A2/ACSS2/ALDH9A1/FH/MDH2/ME1	18
hsa04218	Cellular senescence	49/1536	156/8076	0.000126844	0.00187383	0.00143838	ZFP36L1/HIPK2/CDK2/RBL2/FOXM1/SERPINE1/CHEK2/CHEK1/CCND3/CDK4/NRAS/HLA-E/E2F3/GADD45G/EIF4EBP1/CALML3/CCNB1/MYC/SQSTM1/TGFBR2/KRAS/CDK6/GADD45B/PPP3R1/VDAC1/CCNE1/PPID/PPP1CC/MAPK1/VDAC2/E2F1/TGFB1/MAP2K1/RHEB/CDKN2A/MYBL2/SLC25A6/VDAC3/CALM3/RRAS/CCNA2/NBN/PPP1CB/CXCL8/CCNB2/CAPN2/RBBP4/CDK1/SLC25A4	49
hsa00280	Valine, leucine and isoleucine degradation	20/1536	48/8076	0.00023937	0.00337035	0.00258712	DLD/ACAT2/IVD/HADH/ALDH2/ALDH1B1/HIBADH/HMGCS2/IL4I1/ACADSB/OXCT1/ACADS/HADHA/HSD17B10/ALDH3A2/HMGCL/ACAD8/ACAA1/ALDH9A1/HMGCS1	20
hsa05140	Leishmaniasis	28/1536	77/8076	0.000252237	0.00337035	0.00258712	HLA-DQA1/MARCKSL1/CYBA/ELK1/TAB2/NCF4/EEF1A1/FOS/HLA-DRA/HLA-DMA/HLA-DRB5/FCGR3A/HLA-DPA1/HLA-DMB/JUN/IRAK1/HLA-DPB1/HLA-DOA/MAPK1/STAT1/TGFB1/HLA-DQB1/HLA-DRB1/ITGB1/IFNGR1/HLA-DOB/TLR2/C3	28
hsa05166	Human T-cell leukemia virus 1 infection	63/1536	219/8076	0.000259258	0.00337035	0.00258712	HLA-DQA1/TRRAP/LTBR/ELK1/CDK2/XPO1/ETS2/BUB1B/CHEK2/CHEK1/CCND3/CDK4/NRAS/CDC20/FDPS/HLA-E/E2F3/TSPO/TCF3/FOS/SLC2A1/ZFP36/HLA-DRA/FOSL1/PTTG1/RAN/HLA-DMA/HLA-DRB5/CREB3L1/MYC/IL1R1/HLA-DPA1/ANAPC7/BUB3/HLA-DMB/JUN/TGFBR2/KRAS/HLA-DPB1/PPP3R1/VDAC1/CCNE1/HLA-DOA/MAPK1/VDAC2/E2F1/TGFB1/MAP2K1/RANBP1/CDKN2A/SLC25A6/ESPL1/CDC27/HLA-DQB1/VDAC3/CCNA2/HLA-DRB1/CDKN2C/MAD2L1/HLA-DOB/CCNB2/SLC25A4/EGR1	63
hsa00360	Phenylalanine metabolism	10/1536	17/8076	0.000316207	0.00395259	0.00303405	MAOA/AOC3/ALDH3B1/IL4I1/ALDH3B2/MIF/GOT1/MAOB/GOT2/ALDH3A1	10
hsa04114	Oocyte meiosis	41/1536	129/8076	0.000333087	0.00400938	0.00307764	PPP2R1B/CDK2/PPP2CA/YWHAG/PPP2CB/MAD2L2/PPP2R5A/CDC20/RPS6KA1/YWHAH/SMC3/SMC1A/YWHAB/SLK/CALML3/PTTG1/PKMYT1/CCNB1/FBXO5/PPP2R5D/PLK1/AURKA/ANAPC7/PPP3R1/SKP1/BUB1/CCNE1/PPP1CC/MAPK1/YWHAZ/MAP2K1/YWHAQ/ESPL1/CDC27/RPS6KA2/CALM3/CUL1/MAD2L1/PPP1CB/CCNB2/CDK1	41
hsa04115	p53 signaling pathway	26/1536	73/8076	0.000599682	0.00696059	0.00534303	CDK2/SERPINE1/CHEK2/STEAP3/CHEK1/CCND3/CDK4/CD82/GADD45G/GTSE1/CCNB1/CYCS/CDK6/GADD45B/PERP/CCNE1/CDKN2A/CASP3/PMAIP1/CCNG1/EI24/RRM2B/RRM2/SERPINB5/CCNB2/CDK1	26
hsa05132	Salmonella infection	68/1536	249/8076	0.000753897	0.00844885	0.00648543	ABI1/ACTR1B/TRADD/RILP/KPNA4/TUBB/FLNC/RIPK2/RALA/KIF5B/CSE1L/TAB2/TUBA4A/HSP90AB1/TUBB6/M6PR/RHOB/GAPDH/FOS/PFN2/ARPC3/WASL/TXN/STX10/RAB7A/ACTR3/ACTR2/ARF6/MYC/PAK1/ARPC1A/NCKAP1/TUBB4B/JUN/IRAK1/TUBA1C/ACTG1/MYL9/CYCS/HSP90B1/RAC1/SKP1/AHNAK2/MAPK1/CYTH3/TUBB2B/EXOC5/MAP2K1/CASP3/PFN1/ACTB/DYNC1H1/DYNLL1/ARPC2/TXN2/RRAS/FHOD1/KPNA3/RAB7B/BIRC2/HSP90AA1/ARL8A/CYFIP2/TUBA1B/CXCL8/GSDMD/TLR2/DYNC…	68
hsa05017	Spinocerebellar ataxia	43/1536	143/8076	0.000890516	0.00964726	0.00740535	NOP56/PSMC5/PSMA5/PSMD11/RB1CC1/ATP2A2/PSMA7/PSMD12/ATXN2L/PSMB5/PSMB3/PSMC4/PSMB1/PSMC2/PSMB6/PSMB4/PSMA1/PSMB2/SP1/NFYA/PSMD8/PUM2/CYCS/PSMD1/VDAC1/ADRM1/PSMA6/PSMD14/PSMA3/VDAC2/SLC25A6/PSMD7/OPA1/PSMD2/PSMC6/VDAC3/PSMB7/PSMD3/PSMC3/PPIF/PSMA4/PSMD4/SLC25A4	43
hsa05416	Viral myocarditis	22/1536	60/8076	0.000990396	0.0102746	0.00788692	HLA-DQA1/EIF4G1/HLA-E/HLA-DRA/EIF4G3/HLA-DMA/HLA-DRB5/HLA-DPA1/HLA-DMB/ACTG1/CYCS/HLA-DPB1/RAC1/RAC3/HLA-DOA/CASP3/ACTB/HLA-DQB1/EIF4G2/HLA-DRB1/HLA-DOB/CD55	22
hsa00340	Histidine metabolism	11/1536	22/8076	0.00101166	0.0102746	0.00788692	MAOA/ALDH3B1/ALDH2/ALDH1B1/ALDH3B2/MAOB/ALDH3A2/HNMT/ALDH3A1/ALDH9A1/AOC1	11
hsa00480	Glutathione metabolism	21/1536	57/8076	0.00119305	0.0117498	0.00901925	LAP3/SMS/GPX4/GGT5/IDH2/G6PD/SRM/GGT1/GCLC/GPX1/RRM1/GSTA4/GSS/GSTK1/GPX3/GGT7/PGD/RRM2B/RRM2/GGT6/GCLM	21
hsa05164	Influenza A	49/1536	171/8076	0.00132022	0.0126198	0.00968709	HLA-DQA1/TRADD/DDX58/XPO1/TPSAB1/CCND3/CDK4/KPNA2/FDPS/RAB11B/OAS2/HLA-DRA/HNRNPUL1/IFIH1/HLA-DMA/HLA-DRB5/IL33/HLA-DPA1/HLA-DMB/ACTG1/CYCS/CDK6/ADAR/HLA-DPB1/VDAC1/HLA-DOA/MAPK1/STAT1/TRIM25/NUP98/MAP2K1/SLC25A6/CASP3/ACTB/TMPRSS2/HLA-DQB1/EIF2AK2/CPSF4/EIF2S1/HLA-DRB1/OAS3/IFNGR1/STAT2/OAS1/CXCL10/TPSB2/HLA-DOB/CXCL8/SLC25A4	49
hsa03420	Nucleotide excision repair	18/1536	47/8076	0.00157684	0.0146421	0.0112395	CUL4B/RAD23A/RFC5/DDB1/POLD1/LIG1/RFC3/POLE2/RFC4/GTF2H3/POLD2/RPA3/RFC1/RPA1/PCNA/POLE3/RAD23B/RFC2	18
hsa04510	Focal adhesion	55/1536	201/8076	0.00220896	0.019942	0.0153077	COMP/LAMB3/ITGA6/ELK1/VEGFC/FLNC/CHAD/LAMB1/CCND3/GSK3B/THBS2/SHC2/ACTN4/ITGAV/PIP5K1A/DIAPH1/VCL/PAK1/VEGFD/JUN/ITGA5/ACTG1/MYL9/LAMC1/RAC1/VAV2/RAC3/PPP1CC/MAPK1/GRB2/COL2A1/MAP2K1/COL1A1/FN1/ACTB/SPP1/SHC1/VWF/BIRC2/ITGB1/COL1A2/ACTN1/PPP1CB/ITGA9/PAK2/LAMB2/BAD/ITGB6/CAPN2/CRKL/LAMC2/SRC/ARHGAP5/COL4A1/VEGFB	55
hsa05130	Pathogenic Escherichia coli infection	54/1536	197/8076	0.0023127	0.0203142	0.0155934	ABI1/TRADD/MYO1E/CLDN18/TUBB/MYO10/TAB2/TUBA4A/TUBB6/CLDN2/GAPDH/FOS/ARPC3/WASL/MYO1C/CLDN23/ACTR3/ACTR2/ARHGEF2/ARF6/PAK1/IL1R1/ARPC1A/NCKAP1/TUBB4B/JUN/IRAK1/TUBA1C/ACTG1/CYCS/WASF2/NCL/RAC1/MAPK1/CYTH3/TUBB2B/GNA12/MYH11/GNA13/CASP3/ACTB/ARPC2/CYFIP2/RAB1A/ITGB1/PTPN11/TUBA1B/ARHGEF1/BAIAP2L1/PAK2/CXCL8/ABCF2/SRC/CLDN5	54
hsa05145	Toxoplasmosis	34/1536	112/8076	0.00247511	0.0211687	0.0162493	HLA-DQA1/HSPA1B/LAMB3/ITGA6/TAB2/LAMB1/HLA-DRA/HSPA8/HLA-DMA/HLA-DRB5/HLA-DPA1/HLA-DMB/IRAK1/CYCS/LAMC1/HLA-DPB1/HLA-DOA/MAPK1/STAT1/TGFB1/CASP3/HLA-DQB1/HSPA1A/BIRC2/HLA-DRB1/ITGB1/PPIF/ALOX5/IFNGR1/HLA-DOB/LAMB2/BAD/TLR2/LAMC2	34
hsa04137	Mitophagy - animal	23/1536	68/8076	0.00265325	0.0221104	0.0169722	HIF1A/NRAS/CSNK2A1/RHOT2/SP1/TOMM7/RAB7A/MFN1/GABARAPL2/BNIP3L/JUN/SQSTM1/KRAS/BNIP3/E2F1/OPTN/GABARAP/FIS1/RRAS/RAB7B/PGAM5/CITED2/SRC	23
hsa05211	Renal cell carcinoma	23/1536	69/8076	0.00327827	0.0266359	0.020446	HIF1A/NRAS/SLC2A1/PAK1/ELOC/JUN/ELOB/KRAS/RAC1/ARAF/MAPK1/GRB2/TGFB1/MAP2K1/PRCC/EGLN3/EPAS1/PTPN11/CUL2/PAK2/FH/BAD/CRKL	23
hsa04612	Antigen processing and presentation	25/1536	78/8076	0.00402793	0.0319287	0.0245089	HLA-DQA1/HSPA1B/HSP90AB1/TAP2/HLA-E/HLA-DRA/NFYA/CTSL/HSPA8/HLA-DMA/HLA-DRB5/HLA-DPA1/HLA-DMB/HLA-DPB1/CD74/HLA-DOA/PSME3/HSPA4/HLA-DQB1/HSPA1A/HSP90AA1/HLA-DRB1/TAP1/HLA-DOB/PSME2	25
hsa04142	Lysosome	37/1536	128/8076	0.00415587	0.0321585	0.0246852	ATP6V0D1/NAGLU/CTSD/IDUA/GUSB/ASAH1/M6PR/CTSO/LAPTM4A/ACP5/CTSF/FUCA1/CTSH/CTSL/NPC2/AGA/CTSV/FUCA2/CLTC/ARSA/TPP1/MAN2B1/CTSE/DNASE2/LAMP3/HYAL2/CTSZ/CD63/HGSNAT/GLB1/NAPSA/GLA/SMPD1/AP3D1/IGF2R/GNPTG/GGA2	37
hsa00330	Arginine and proline metabolism	18/1536	51/8076	0.00447068	0.03379	0.0259376	MAOA/PYCR1/PYCR2/LAP3/ALDH2/SAT2/ALDH1B1/SMS/PRODH/ALDH18A1/SRM/GOT1/MAOB/P4HA1/ALDH3A2/GOT2/ALDH9A1/AOC1	18
hsa00072	Synthesis and degradation of ketone bodies	6/1536	10/8076	0.0048743	0.0360033	0.0276366	ACAT2/HMGCS2/OXCT1/HMGCL/BDH2/HMGCS1	6
hsa05010	Alzheimer disease	90/1536	369/8076	0.00527306	0.0380832	0.0292331	UQCR11/PSMC5/NDUFB10/PSMA5/PSMD11/RB1CC1/ATP2A2/TUBB/PSMA7/PSMD12/KIF5B/ADAM17/PSMB5/UQCRFS1/PSMB3/RTN3/TUBA4A/COX4I2/NRAS/PSMC4/CSNK2A1/TUBB6/PSMB1/PSMC2/GSK3B/PSMB6/PSMB4/GAPDH/PSMA1/PSMB2/LPL/NDUFA2/ATP5F1C/DVL3/CALML3/PSMD8/AGER/ATP5F1B/TUBB4B/ATP5MC3/TUBA1C/CYCS/KRAS/FZD6/PPP3R1/HSD17B10/PSMD1/VDAC1/NDUFS6/CYC1/ARAF/UQCRH/ADRM1/PPID/PSMA6/PSMD14/MAPK1/PSMA3/RTN4/TUBB2B/VDAC2/COX7A1/ADAM10/ND…	90
hsa00520	Amino sugar and nucleotide sugar metabolism	17/1536	48/8076	0.00543319	0.0383867	0.0294661	GALE/HK2/PGM2/CHIA/GFPT1/UGDH/GNPNAT1/CYB5R3/CMAS/HK1/CHIT1/PMM1/PGM3/UGP2/UAP1/CYB5R1/GPI	17
hsa05220	Chronic myeloid leukemia	24/1536	76/8076	0.00588654	0.0400615	0.0307517	CDK4/NRAS/E2F3/SHC2/GADD45G/MYC/TGFBR2/KRAS/CDK6/GADD45B/ARAF/MAPK1/HDAC1/E2F1/GRB2/TGFB1/MAP2K1/CDKN2A/MECOM/SHC1/PTPN11/BAD/CRKL/HDAC2	24
hsa00030	Pentose phosphate pathway	12/1536	30/8076	0.00619927	0.0400615	0.0307517	ALDOA/RPE/PGM2/PRPS2/DERA/PRPS1/G6PD/FBP1/RPIA/PGD/GPI/PFKP	12
hsa05219	Bladder cancer	15/1536	41/8076	0.00624428	0.0400615	0.0307517	CDK4/NRAS/E2F3/MMP1/MYC/KRAS/ARAF/MAPK1/FGFR3/E2F1/MAP2K1/CDKN2A/DAPK1/CXCL8/SRC	15
hsa05022	Pathways of neurodegeneration - multiple diseases	112/1536	475/8076	0.00628345	0.0400615	0.0307517	UBE2G1/CAT/ACTR1B/UQCR11/DNALI1/PSMC5/NDUFB10/PSMA5/DERL1/PSMD11/RB1CC1/ATP2A2/TUBB/NEFH/PSMA7/UBE2L3/VCP/PSMD12/ATXN2L/KIF5B/SIGMAR1/PSMB5/UQCRFS1/PSMB3/TUBA4A/COX4I2/NRAS/PSMC4/CSNK2A1/TUBB6/PSMB1/PSMC2/GSK3B/PSMB6/PSMB4/PSMA1/PSMB2/NDUFA2/ATP5F1C/UBA1/DVL3/CALML3/PSMD8/UBA7/AGER/MFN1/GABARAPL2/ATP5F1B/TUBB4B/SQSTM1/ATP5MC3/TUBA1C/CYCS/KRAS/GPX1/FZD6/PPP3R1/HSD17B10/RAC1/PSMD1/TARDBP/VDAC1/NDUF…	112
hsa03015	mRNA surveillance pathway	29/1536	97/8076	0.00628658	0.0400615	0.0307517	PPP2R1B/RBM8A/CPSF6/PPP2CA/EIF4A3/SMG7/PPP2CB/PNN/PPP2R5A/ETF1/CASC3/CSTF3/MAGOH/WDR82/PABPC1/PPP2R5D/PAPOLA/CPSF7/NCBP1/TARDBP/PPP1CC/CSTF2/ALYREF/CPSF4/NCBP2/SMG5/NUDT21/PPP1CB/CPSF3	29
hsa04210	Apoptosis	38/1536	136/8076	0.00687723	0.0424407	0.032578	GZMB/TRADD/CTSD/PARP3/TUBA4A/NRAS/SPTAN1/PARP1/CTSO/FOS/GADD45G/CTSF/CTSH/CTSL/PTPN13/LMNB2/CTSV/LMNB1/JUN/TUBA1C/ACTG1/CYCS/KRAS/GADD45B/MAPK1/BIRC5/MAP2K1/CASP3/ACTB/PMAIP1/BIRC2/EIF2S1/CTSZ/DDIT3/TUBA1B/BAD/CAPN2/PARP2	38
hsa03010	Ribosome	43/1536	158/8076	0.00701844	0.0424407	0.032578	RPL27A/RPS13/MRPL12/RPS9/RPL10A/RPLP2/RPL31/RPL15/RPL29/RPS28/MRPL3/MRPL18/MRPL30/RPL13/MRPL21/MRPL9/MRPL11/RPS4X/MRPS12/RPL21/RPL11/RPL34/RPLP1/MRPL19/RPS14/MRPL15/RPS15A/RPS27/RPLP0/RPL26/RPL10/MRPS15/MRPS16/RPS23/RPL9/MRPS7/RPS11/MRPS2/RPL13A/RPL3/MRPS10/RPL14/MRPL13	43
hsa00240	Pyrimidine metabolism	19/1536	57/8076	0.00718228	0.0424407	0.032578	PNP/DCK/NME3/NT5C3B/TYMS/DCTPP1/NME2/CANT1/NT5C3A/CAD/NME1/UCK2/RRM1/TK1/CTPS1/RRM2B/ENTPD3/RRM2/DTYMK	19
hsa01212	Fatty acid metabolism	19/1536	57/8076	0.00718228	0.0424407	0.032578	ACSL5/ELOVL1/HACD2/ACAT2/HADH/SCP2/HSD17B4/ACSL3/ACADSB/ACADS/HSD17B8/HADHA/SCD/ACSL4/ELOVL5/ACAA1/ACADVL/FADS1/FADS2	19
hsa05210	Colorectal cancer	26/1536	86/8076	0.00800921	0.0450582	0.0345872	MSH2/MSH6/RALA/NRAS/GSK3B/FOS/GADD45G/MYC/EREG/RALB/JUN/TGFBR2/CYCS/KRAS/GADD45B/RAC1/ARAF/RAC3/MAPK1/GRB2/TGFB1/BIRC5/MAP2K1/CASP3/PMAIP1/BAD	26
hsa00071	Fatty acid degradation	15/1536	42/8076	0.00804116	0.0450582	0.0345872	ACSL5/ACAT2/HADH/ALDH2/ALDH1B1/ACSL3/ACADSB/ACADS/ADH1B/HADHA/ACSL4/ALDH3A2/ACAA1/ACADVL/ALDH9A1	15
hsa00380	Tryptophan metabolism	15/1536	42/8076	0.00804116	0.0450582	0.0345872	MAOA/CAT/DLD/ACAT2/HADH/ALDH2/ALDH1B1/IDO1/IL4I1/INMT/HADHA/MAOB/ALDH3A2/ALDH9A1/AOC1	15
hsa05203	Viral carcinogenesis	53/1536	204/8076	0.00822971	0.0453331	0.0347982	TRADD/ATP6V0D1/LTBR/CHD4/CDK2/IL6ST/GSN/YWHAG/DDB1/RBL2/SNW1/CHEK1/CCND3/CDK4/NRAS/CDC20/HLA-E/YWHAH/ACTN4/YWHAB/CREB3L1/HPN/GTF2H3/DDX3X/JUN/KRAS/CDK6/RAC1/PKM/CCNE1/MAPK1/HDAC1/GRB2/YWHAZ/RANBP1/CDKN2A/YWHAQ/CASP3/PMAIP1/EIF2AK2/VDAC3/CCNA2/SKP2/SND1/ACTN1/GTF2A1/BAD/HNRNPK/CDK1/SRC/HDAC2/C3/SCRIB	53
hsa05310	Asthma	12/1536	31/8076	0.00839692	0.0454833	0.0349135	HLA-DQA1/FCER1A/HLA-DRA/HLA-DMA/HLA-DRB5/HLA-DPA1/HLA-DMB/HLA-DPB1/HLA-DOA/HLA-DQB1/HLA-DRB1/HLA-DOB	12
hsa04810	Regulation of actin cytoskeleton	56/1536	218/8076	0.00859567	0.0457966	0.035154	ITGA6/ENAH/GSN/GIT1/NRAS/PFN2/ARPC3/WASL/ACTN4/ITGAV/PIP4K2A/PIP5K1A/DIAPH1/ACTR3/VCL/ACTR2/PAK1/ARPC1A/NCKAP1/ITGA5/ACTG1/MYL9/KRAS/WASF2/RAC1/ARAF/PIP4K2C/VAV2/RAC3/PPP1CC/MAPK1/FGFR3/GNA12/MAP2K1/MYH11/GNA13/FN1/PFN1/ACTB/ARPC2/RDX/RRAS/CYFIP2/CFL1/ITGB1/LIMK1/ACTN1/PPP1CB/TMSB4X/ITGA9/ARHGEF1/PAK2/ITGB6/IQGAP3/CRKL/SRC	56
hsa05171	Coronavirus disease - COVID-19	59/1536	232/8076	0.00889685	0.0466367	0.0357989	RPL27A/RPS13/IL6R/DDX58/IL6ST/ISG15/RPS9/TAB2/ADAM17/RPL10A/RPLP2/RPL31/RPL15/CFD/RPL29/RPS28/FOS/OAS2/MMP1/RPL13/C7/IFIH1/RPS4X/FCGR3A/RPL21/RPL11/JUN/IRAK1/RPL34/RPLP1/ADAR/RPS14/MAPK1/STAT1/RPS15A/RPS27/FGB/RPLP0/RPL26/ACE2/RPL10/TMPRSS2/CGAS/EIF2AK2/RPS23/RPL9/VWF/C2/RPS11/RPL13A/OAS3/STAT2/OAS1/CXCL10/RPL3/CXCL8/TLR2/RPL14/C3	59
hsa05160	Hepatitis C	42/1536	157/8076	0.0104385	0.0538495	0.0413355	PPP2R1B/TRADD/DDX58/CLDN18/CDK2/PPP2CA/SCARB1/YWHAG/PPP2CB/CDK4/NRAS/GSK3B/CLDN2/YWHAH/E2F3/OAS2/YWHAB/CLDN23/MYC/EIF2AK1/CYCS/KRAS/CDK6/ARAF/MAPK1/STAT1/PSME3/E2F1/GRB2/YWHAZ/MAP2K1/YWHAQ/CASP3/CD81/EIF2AK2/EIF2S1/OAS3/STAT2/OAS1/CXCL10/BAD/CLDN5	42
hsa05323	Rheumatoid arthritis	27/1536	93/8076	0.0123513	0.0627213	0.0481456	HLA-DQA1/ATP6V0D1/CXCL5/TNFSF13/FOS/HLA-DRA/ACP5/MMP1/CTSL/HLA-DMA/HLA-DRB5/ATP6V1C1/ATP6V1A/HLA-DPA1/HLA-DMB/JUN/HLA-DPB1/HLA-DOA/TGFB1/ATP6V0E1/HLA-DQB1/HLA-DRB1/CCL20/LTB/HLA-DOB/CXCL8/TLR2	27
Abbreviation: KEGG, kyoto encyclopaedia of genes and genomes; DEGs, differentially expressed genes.
